# Supplementary material
Source: HighWire-hosted journal article supplement (https://www.cmaj.ca/content/suppl/2024/03/05/196.9.E282)
Supplement: 231358-res-4-at.pdf [file 231358-res-4-at.pdf]

**Appendix 4: Children’s Oncology Group Long-term follow up guidelines versions 1.0, 2.0, 3.0, 4.0 and 5.0**

|           | <b>Breast Cancer</b>                                                                                                                                                                                                                                | <b>Colorectal Cancer</b>                                                                                                                                                                                                                                                                                                                   | <b>Cardiomyopathy</b>             |                                       |                                     |                                            |
|-----------|-----------------------------------------------------------------------------------------------------------------------------------------------------------------------------------------------------------------------------------------------------|--------------------------------------------------------------------------------------------------------------------------------------------------------------------------------------------------------------------------------------------------------------------------------------------------------------------------------------------|-----------------------------------|---------------------------------------|-------------------------------------|--------------------------------------------|
| <b>V1</b> | <u>Therapeutic Exposure:</u><br>Total Body Irradiation<br>Mantle<br>Mediastinal<br>Whole lung<br>Spinal (> 30 Gy)<br><br><u>Surveillance:</u><br>Mammogram, Yearly,<br>beginning 8 years after radiation<br>or at age 25 (whichever occurs<br>last) | <u>Therapeutic Exposure:</u><br>Total body irradiation<br>Abdominal or pelvic radiation >25 Gy<br>Spinal radiation >25 Gy<br><br><u>Surveillance:</u><br>10 years after radiation or 25 (whichever is<br>last)- every 10 years<br><br>Fecal occult blood test AND Flexible<br>sigmoidoscopy every 5 years OR<br>Colonoscopy every 10 years | <b>Age at<br/>Treatm<br/>ent*</b> | <b>Chest<br/>Ra-<br/>diatio<br/>n</b> | <b>Anthracycl<br/>ine Dose*</b>     | <b>Recomm<br/>ended<br/>Freque<br/>ncy</b> |
|           |                                                                                                                                                                                                                                                     |                                                                                                                                                                                                                                                                                                                                            | < 1 year<br>old                   | Yes                                   | Any                                 | Every<br>year                              |
|           |                                                                                                                                                                                                                                                     |                                                                                                                                                                                                                                                                                                                                            | < 1 year<br>old                   | No                                    | < 200<br>mg/m <sup>2</sup>          | Every 2<br>years                           |
|           |                                                                                                                                                                                                                                                     |                                                                                                                                                                                                                                                                                                                                            | < 1 year<br>old                   | No                                    | ≥ 200<br>mg/m <sup>2</sup>          | Every<br>year                              |
|           |                                                                                                                                                                                                                                                     |                                                                                                                                                                                                                                                                                                                                            | 1-4<br>years<br>old               | Yes                                   | Any                                 | Every<br>year                              |
|           |                                                                                                                                                                                                                                                     |                                                                                                                                                                                                                                                                                                                                            | 1-4<br>years<br>old               | No                                    | < 100<br>mg/m <sup>2</sup>          | Every 5<br>years                           |
|           |                                                                                                                                                                                                                                                     |                                                                                                                                                                                                                                                                                                                                            | 1-4<br>years<br>old               | No                                    | ≥ 100 to <<br>300 mg/m <sup>2</sup> | Every 2<br>years                           |
|           |                                                                                                                                                                                                                                                     |                                                                                                                                                                                                                                                                                                                                            | 1-4<br>years<br>old               | No                                    | ≥ 300<br>mg/m <sup>2</sup>          | Every<br>year                              |
|           |                                                                                                                                                                                                                                                     |                                                                                                                                                                                                                                                                                                                                            | ≥ 5<br>years<br>old               | Yes                                   | < 300<br>mg/m <sup>2</sup>          | Every 2<br>years                           |
|           |                                                                                                                                                                                                                                                     |                                                                                                                                                                                                                                                                                                                                            | ≥ 5<br>years<br>old               | Yes                                   | ≥ 300<br>mg/m <sup>2</sup>          | Every<br>year                              |

|                         |                                                                                                                                                                                                                                                                                                    |                                                                                                                                                                                                                                                                                                                                                                  | <table border="1"> <tr> <td>≥ 5 years old</td> <td>No</td> <td>&lt; 200 mg/m<sup>2</sup></td> <td>Every 5 years</td> </tr> <tr> <td>≥ 5 years old</td> <td>No</td> <td>≥ 200 to &lt; 300 mg/m<sup>2</sup></td> <td>Every 2 years</td> </tr> <tr> <td>≥ 5 years old</td> <td>No</td> <td>≥ 300 mg/m<sup>2</sup></td> <td></td> </tr> </table>                                                                                                                                                                                                                                                                                                                                                                                                                                                                                                                                                           | ≥ 5 years old      | No             | < 200 mg/m <sup>2</sup> | Every 5 years | ≥ 5 years old   | No              | ≥ 200 to < 300 mg/m <sup>2</sup> | Every 2 years | ≥ 5 years old | No            | ≥ 300 mg/m <sup>2</sup> |                 |               |         |               |                         |             |               |
|-------------------------|----------------------------------------------------------------------------------------------------------------------------------------------------------------------------------------------------------------------------------------------------------------------------------------------------|------------------------------------------------------------------------------------------------------------------------------------------------------------------------------------------------------------------------------------------------------------------------------------------------------------------------------------------------------------------|--------------------------------------------------------------------------------------------------------------------------------------------------------------------------------------------------------------------------------------------------------------------------------------------------------------------------------------------------------------------------------------------------------------------------------------------------------------------------------------------------------------------------------------------------------------------------------------------------------------------------------------------------------------------------------------------------------------------------------------------------------------------------------------------------------------------------------------------------------------------------------------------------------|--------------------|----------------|-------------------------|---------------|-----------------|-----------------|----------------------------------|---------------|---------------|---------------|-------------------------|-----------------|---------------|---------|---------------|-------------------------|-------------|---------------|
| ≥ 5 years old           | No                                                                                                                                                                                                                                                                                                 | < 200 mg/m <sup>2</sup>                                                                                                                                                                                                                                                                                                                                          | Every 5 years                                                                                                                                                                                                                                                                                                                                                                                                                                                                                                                                                                                                                                                                                                                                                                                                                                                                                          |                    |                |                         |               |                 |                 |                                  |               |               |               |                         |                 |               |         |               |                         |             |               |
| ≥ 5 years old           | No                                                                                                                                                                                                                                                                                                 | ≥ 200 to < 300 mg/m <sup>2</sup>                                                                                                                                                                                                                                                                                                                                 | Every 2 years                                                                                                                                                                                                                                                                                                                                                                                                                                                                                                                                                                                                                                                                                                                                                                                                                                                                                          |                    |                |                         |               |                 |                 |                                  |               |               |               |                         |                 |               |         |               |                         |             |               |
| ≥ 5 years old           | No                                                                                                                                                                                                                                                                                                 | ≥ 300 mg/m <sup>2</sup>                                                                                                                                                                                                                                                                                                                                          |                                                                                                                                                                                                                                                                                                                                                                                                                                                                                                                                                                                                                                                                                                                                                                                                                                                                                                        |                    |                |                         |               |                 |                 |                                  |               |               |               |                         |                 |               |         |               |                         |             |               |
| <b>V2</b>               | <p><u>Therapeutic Exposure:</u><br/>≥ 20 Gy to: Mantle, Mini-Mantle, Mediastinal, Chest (thorax), Axilla</p> <p><u>Surveillance:</u><br/>Mammogram, yearly (Beginning 8 years after radiation or at age 25, whichever occurs last)</p>                                                             | <p><u>Therapeutic Exposure:</u><br/>≥ 30 Gy of radiation exposure to any of the following: hepatic, inverted Y, left flank/hemiabdomen, right upper quadrant, spleen (entire or partial), whole abdomen, bladder, femoral, iliac, inguinal, pelvic, prostate, vaginal, spine (any or all: lumbar, sacral, thoracic, whole), STLI, extended mantle, TBI, TLI.</p> | <p><u>Therapeutic Exposure:</u><br/>Cumulative exposure of all anthracycline chemotherapy received (i.e., doxorubicin, daunorubicin, mitoxantrone and epirubicin)</p> <p><u>Surveillance:</u><br/>Echocardiogram (or comparable imaging to evaluate cardiac function)</p> <table border="1"> <thead> <tr> <th>Anthracycline Dose</th> <th>Radiation Dose</th> <th>Recommended Frequency</th> </tr> </thead> <tbody> <tr> <td rowspan="3">None</td> <td>&lt; 15 Gy or none</td> <td>No surveillance</td> </tr> <tr> <td>≥ 15 - &lt; 35 Gy</td> <td>Every 5 years</td> </tr> <tr> <td>≥ 35 Gy</td> <td>Every 2 years</td> </tr> <tr> <td rowspan="2">&lt; 250 mg/m<sup>2</sup></td> <td>&lt; 15 Gy or none</td> <td>Every 5 years</td> </tr> <tr> <td>≥ 15 Gy</td> <td>Every 2 years</td> </tr> <tr> <td>≥ 250 mg/m<sup>2</sup></td> <td>Any or none</td> <td>Every 2 years</td> </tr> </tbody> </table> | Anthracycline Dose | Radiation Dose | Recommended Frequency   | None          | < 15 Gy or none | No surveillance | ≥ 15 - < 35 Gy                   | Every 5 years | ≥ 35 Gy       | Every 2 years | < 250 mg/m <sup>2</sup> | < 15 Gy or none | Every 5 years | ≥ 15 Gy | Every 2 years | ≥ 250 mg/m <sup>2</sup> | Any or none | Every 2 years |
| Anthracycline Dose      | Radiation Dose                                                                                                                                                                                                                                                                                     | Recommended Frequency                                                                                                                                                                                                                                                                                                                                            |                                                                                                                                                                                                                                                                                                                                                                                                                                                                                                                                                                                                                                                                                                                                                                                                                                                                                                        |                    |                |                         |               |                 |                 |                                  |               |               |               |                         |                 |               |         |               |                         |             |               |
| None                    | < 15 Gy or none                                                                                                                                                                                                                                                                                    | No surveillance                                                                                                                                                                                                                                                                                                                                                  |                                                                                                                                                                                                                                                                                                                                                                                                                                                                                                                                                                                                                                                                                                                                                                                                                                                                                                        |                    |                |                         |               |                 |                 |                                  |               |               |               |                         |                 |               |         |               |                         |             |               |
|                         | ≥ 15 - < 35 Gy                                                                                                                                                                                                                                                                                     | Every 5 years                                                                                                                                                                                                                                                                                                                                                    |                                                                                                                                                                                                                                                                                                                                                                                                                                                                                                                                                                                                                                                                                                                                                                                                                                                                                                        |                    |                |                         |               |                 |                 |                                  |               |               |               |                         |                 |               |         |               |                         |             |               |
|                         | ≥ 35 Gy                                                                                                                                                                                                                                                                                            | Every 2 years                                                                                                                                                                                                                                                                                                                                                    |                                                                                                                                                                                                                                                                                                                                                                                                                                                                                                                                                                                                                                                                                                                                                                                                                                                                                                        |                    |                |                         |               |                 |                 |                                  |               |               |               |                         |                 |               |         |               |                         |             |               |
| < 250 mg/m <sup>2</sup> | < 15 Gy or none                                                                                                                                                                                                                                                                                    | Every 5 years                                                                                                                                                                                                                                                                                                                                                    |                                                                                                                                                                                                                                                                                                                                                                                                                                                                                                                                                                                                                                                                                                                                                                                                                                                                                                        |                    |                |                         |               |                 |                 |                                  |               |               |               |                         |                 |               |         |               |                         |             |               |
|                         | ≥ 15 Gy                                                                                                                                                                                                                                                                                            | Every 2 years                                                                                                                                                                                                                                                                                                                                                    |                                                                                                                                                                                                                                                                                                                                                                                                                                                                                                                                                                                                                                                                                                                                                                                                                                                                                                        |                    |                |                         |               |                 |                 |                                  |               |               |               |                         |                 |               |         |               |                         |             |               |
| ≥ 250 mg/m <sup>2</sup> | Any or none                                                                                                                                                                                                                                                                                        | Every 2 years                                                                                                                                                                                                                                                                                                                                                    |                                                                                                                                                                                                                                                                                                                                                                                                                                                                                                                                                                                                                                                                                                                                                                                                                                                                                                        |                    |                |                         |               |                 |                 |                                  |               |               |               |                         |                 |               |         |               |                         |             |               |
| <b>V3</b>               | <p><u>Therapeutic Exposure:</u><br/>≥ 20 Gy to: Chest (thorax), Whole lung<br/>Mediastinal, Axilla, Mini-Mantle, Mantle<br/>Extended Mantle, TLI, STLI, TBI* <u>Surveillance:</u><br/>Mammogram and Breast MRI, Yearly, beginning 8 years after radiation or at age 25, whichever occurs last.</p> | <p><u>Surveillance:</u><br/><i>Colonoscopy</i> – Performed every 5 years (minimum), beginning at age 35 or 10-years after radiation, whichever occurs last. More frequently if indicated on colonoscopy results</p>                                                                                                                                              |                                                                                                                                                                                                                                                                                                                                                                                                                                                                                                                                                                                                                                                                                                                                                                                                                                                                                                        |                    |                |                         |               |                 |                 |                                  |               |               |               |                         |                 |               |         |               |                         |             |               |
| <b>V4</b>               | <p><u>Therapeutic Exposure:</u><br/>≥ 10 Gy of radiation exposure to any of the following: subtotal</p>                                                                                                                                                                                            |                                                                                                                                                                                                                                                                                                                                                                  |                                                                                                                                                                                                                                                                                                                                                                                                                                                                                                                                                                                                                                                                                                                                                                                                                                                                                                        |                    |                |                         |               |                 |                 |                                  |               |               |               |                         |                 |               |         |               |                         |             |               |

|           |                                                                                                                                                                                                                                                                                                                                                                             |                                                                                                                                                                                                                                                                                                                                                                                                                                                                                                        |  |
|-----------|-----------------------------------------------------------------------------------------------------------------------------------------------------------------------------------------------------------------------------------------------------------------------------------------------------------------------------------------------------------------------------|--------------------------------------------------------------------------------------------------------------------------------------------------------------------------------------------------------------------------------------------------------------------------------------------------------------------------------------------------------------------------------------------------------------------------------------------------------------------------------------------------------|--|
|           | <p>lymphoid irradiation (STLI), axilla, chest (thorax), extended mantle, mantle, mediastinal, mini-mantle, whole lung, total body irradiation (TBI), total lymphoid irradiation (TLI)</p> <p><u>Surveillance:</u><br/>Mammogram and Breast MRI, Yearly, beginning 8 years after radiation or at age 25, whichever occurs last.</p>                                          |                                                                                                                                                                                                                                                                                                                                                                                                                                                                                                        |  |
| <b>V5</b> | <p><u>Therapeutic Exposure:</u><br/>Any level of radiation exposure to the chest, axilla or TBI</p> <p><u>Surveillance:</u><br/><i>Mammography</i> - Yearly, beginning at age 25 or 6 years post-radiation, whichever occurs last</p> <p><i>Breast MRI</i> – Yearly, as an adjunct to mammography beginning at age 25 or 8-years post-radiation, whichever occurs last.</p> | <p><u>Therapeutic Exposure:</u><br/>Any level of radiation exposure to the abdomen, pelvis, spine (lumbar, sacral, whole), TBI</p> <p><u>Surveillance:</u><br/><i>Multitarget stool DNA test</i> – performed every 3 years, beginning at age 30 or 5-years following radiation, whichever occurs last. Positive result should be followed up with a timely colonoscopy.</p> <p><i>Colonoscopy</i> – Performed every 5 years, beginning at age 30 or 5-years after radiation, whichever occurs last</p> |  |
